1 **Prevalence and risk factors associated with *Haemophilus ducreyi* cutaneous ulcers in**  
2 **Cameroon**

3 Philippe Ndzomo<sup>1,2</sup>, Serges Tchatchouang<sup>1</sup>, Earnest Njih Tabah<sup>3,4</sup>, Theophilus Njamnshi<sup>3,5</sup>,  
4 Mireille Victorine Noah Tsanga<sup>1</sup>, Jude Alexis Bondi<sup>1</sup>, Rebecca Handley<sup>6</sup>, Camila González  
5 Beiras<sup>7</sup>, Jules Tchatchueng<sup>1</sup>, Claudia Müller<sup>8</sup>, Simone Lueert<sup>8</sup>, Sascha Knauf<sup>8</sup>, Onana  
6 Boyomo<sup>2</sup>, Emma Harding-Esch<sup>6</sup>, Oriol Mitja<sup>7</sup>, Tania Crucitti<sup>9</sup>, Michael Marks<sup>6,10,11</sup>, Sara  
7 Eyangoh<sup>1\*</sup>

8  
9 **Affiliations**

- 10 1. Centre Pasteur du Cameroun, Yaounde, Cameroon, Pasteur Network.  
11 2. Department of Microbiology, Faculty of Science, University of Yaounde 1, Yaounde,  
12 Cameroon.  
13 3. National Yaws, Leishmaniasis, Leprosy and Buruli ulcer Control Programme, Ministry  
14 of Public Health, Yaounde, Cameroon  
15 4. Department of Public Health, Faculty of Medicine and Pharmaceutical Sciences,  
16 University of Dschang, West Cameroon.  
17 5. Department of Medical Laboratory Sciences, Faculty of Health Sciences, University of  
18 Buea, Buea, Cameroon  
19 6. Clinical Research Department, Faculty of Infectious and Tropical Diseases, London  
20 School of Hygiene and Tropical Medicine, London, UK  
21 7. Department of Infectious Diseases, Hospital Universitari Germans Trias i Pujol,  
22 Badalona, Spain  
23 8. Institute of International Animal Health/One Health, Friedrich-Loeffler-Institut, Federal  
24 Research Institute for Animal Health, Greifswald - Insel Riems, Germany

**NOTE: This preprint reports new research that has not been certified by peer review and should not be used to guide clinical practice.**

25 9. Experimental Bacteriology Unit, Institut Pasteur de Madagascar, Antananarivo,  
26 Madagascar

27 10. Hospital for Tropical Diseases, University College London Hospital, London, United  
28 Kingdom

29 11. Division of Infection and Immunity, University College London, London, United  
30 Kingdom

31

32 \*Corresponding author

33 Email : [eyangoh@pasteur-yaounde.org](mailto:eyangoh@pasteur-yaounde.org) (SE)

34

## 35 **Abstract**

36 Epidemics of yaws-like cutaneous ulcers are regularly documented in children in the  
37 tropics. They occur mainly in poor and remote communities without access to health facilities.  
38 The integration of molecular tools into yaws control efforts has made it possible to describe  
39 *Haemophilus ducreyi* (*HD*) as a major cause of cutaneous ulcers. The objective of this work  
40 was to determine the prevalence of *HD* as cause of cutaneous ulcers, as asymptomatic carriage  
41 and the risk factors associated.

42 A cross-sectional study was conducted in yaws endemic districts of Cameroon.  
43 Participants included people presenting yaws-like ulcers and asymptomatic individuals. Swab  
44 samples were collected from each participant and tested for *HD* and *Treponema pallidum* (*TP*)  
45 using established qPCR method. Additionally, demographic, habitat, proximity, and hygiene  
46 characteristics were collected using a structured questionnaire.

47 A total of 443 individuals, including 271 ulcer cases and 172 asymptomatic contacts,  
48 were enrolled in this study. The prevalence of *HD* in ulcers was 30.3% (Confidence Interval  
49 (CI) 95% [24.8 – 35.7]) and the prevalence of asymptomatic *HD* carriage was 8.6% (CI95%

50 [4.5 – 12.9]). *TP* was also detected in our sample among ulcer cases but in lower proportion  
51 (5.2% CI95% [2.5 – 7.8]) compared to *HD*. The adjusted logistic regression model showed that  
52 women were as much at risk of having *HD* cutaneous ulcer as men regardless of age; physical  
53 proximity to a confirmed ulcer case was the major factor favouring *HD* transmission. *HD* ulcers  
54 were more likely to be present on Bantu individuals compare to Baka as well as *HD*  
55 colonization.

56 Data from this study highlight *HD* as the most common cause of cutaneous ulcers in  
57 yaws-endemic communities in Cameroon. The real issues of *HD* detection on intact skin are  
58 not yet clear. Further studies are needed to elucidate the implications of this carriage in the  
59 spread dynamics of the disease.

60

## 61 **Author summary**

62 Cutaneous ulcers are commonly found affecting children in low-income countries of  
63 Africa and the South Pacific. In rural and remote communities of Cameroon the limited access  
64 to health care and shortage of sanitation is associated with a high morbidity of cutaneous ulcers.  
65 The latter represent an important cause of suffering and stigmatization in children. *HD* is  
66 commonly known as the causative agent of the sexually transmitted infection chancroid and has  
67 been recently described as a leading cause of cutaneous ulcers in yaws-endemic regions. In this  
68 study, we investigated the presence of *HD* and the associated risk factors. Our findings indicate  
69 a prevalence of *HD* associated with cutaneous ulcers of 30.3% and a prevalence of  
70 asymptomatic *HD* carriage of 5.2%. Physical proximity to a confirmed ulcer case, Bantu  
71 ethnicity, and the use of traditional latrines were the main risk factors associated with *HD* ulcers.  
72 *TP* DNA was detected in some cutaneous ulcer samples but in lower proportion compared to  
73 *HD*. This study confirms that *HD* is a leading cause of cutaneous ulcer in yaws endemic areas  
74 in Cameroon. National control programmes in endemic countries should therefore consider this

75 pathogen in their strategies for controlling and eliminating skin neglected tropical diseases  
76 (NTDs).

## 77 **Introduction**

78 Cutaneous ulcers remain a public health problem in many parts of the world especially  
79 in the South Pacific, South East Asia, and West and Central Africa [1–3]. They predominantly  
80 affect children living in remote communities with limited water and hygiene and who lack  
81 access to health services. The clinical manifestations of cutaneous ulcers vary depending on the  
82 causative organism and can range from small sores to multiple deep lesions which can evolve  
83 to bone damage [1].

84 In Africa, South East Asia and the South Pacific Islands most cutaneous ulcers in  
85 children have been attributed to yaws, caused by *Treponema pallidum* subsp. *pertenue* (*TPE*)  
86 [4,5] based on a clinical diagnosis which is known to be unreliable [6–8] . PCR which is the  
87 gold standard diagnosis has made it possible to detect other aetiological agents of cutaneous  
88 ulcers such as *HD*, which is often co-endemic and may also occur as a co-morbidity with *TPE*.

89 *HD* is a fastidious Gram negative coccobacillus traditionally considered as the causative  
90 agent of chancroid, a sexually transmitted infection characterized by the appearance of ulcers  
91 on the genitals accompanied by suppurative lymphadenopathy [9]. In recent years, multiple  
92 studies have reported cutaneous ulcers caused by *H. ducreyi*, including Papua New Guinea [1],  
93 [10], the Solomon Islands [11], the Fidji Islands [12], Vanuatu [13], Indonesia [14], Sudan [15],  
94 Ghana [16] and Cameroon [17].

95 The true extent of the burden of *HD* cutaneous ulcers is still unclear, but several studies  
96 have established that *HD* may account for 20-60% of skin ulcers clinically diagnosed as yaws  
97 [1] [10] [18–20]. Moreover, *HD* was found colonizing fomites and the healthy skin of  
98 asymptomatic contacts [21].

99           The epidemiology of *HD* remains poorly understood. In most endemic areas of Africa  
100 and the South Pacific, the prevalence of *HD* as a cause of genital or cutaneous ulcers is not  
101 known due to the lack of confirmatory diagnosis in most settings. Traditionally diagnosis relied  
102 on culture but this was challenging due to special conditions required for culture which were  
103 not available in low and middle income country health services [22]. Today, nucleic acid  
104 amplification tests (NAATs) represent an alternative approach. Whilst they still require  
105 infrastructure and well-trained personnel, the stringent sample transport requirements which  
106 create a barrier to culture *HD* are not needed for NAATs [23,24].

107           Several factors have been associated with the transmission of certain skin NTDs such  
108 as yaws; these include demographic characteristics (age, sex), hygiene and sanitation indicators  
109 (poor hand-washing habits, sharing of clothes, frequency of bathing and contact with infected  
110 individuals) and housing characteristics (inadequate sanitation, overcrowded houses) [25], but  
111 we lack information on the risk factors for *HD* cutaneous ulcers. The limited information that  
112 is available suggests there may be both an environmental reservoir and a role for vectors in  
113 transmission and these may partly explain the persistence of *HD* ulcers following azithromycin  
114 mass drug administration [21].

115           To address these gaps, we designed a study to determine the prevalence of *HD* as a cause  
116 of cutaneous ulcers and the frequency of asymptomatic carriage in yaws endemic districts of  
117 Cameroon and to identify associated risk factors. These districts were mainly made up of two  
118 major ethnic groups: the Baka and the Bantu. The Baka, also known as pygmies, are a semi-  
119 sedentary group of people who live in forest camps and sleep in mud or straw huts. They live  
120 essentially from hunting, gathering and, to a lesser extent, from farming, for which they are  
121 employed as labourers by their Bantu neighbours, who are sedentary and form a more  
122 developed community with modern behaviour [26].

## 123 **Methods**

### 124 **Ethic statement**

125 This study was approved by the National Ethics Committee for Human Health Research  
126 (N°2020 / 12/ 1327/ CE/ CNERSH/ SP) and the Ministry of public Health (approval N°631-  
127 021). All participants or their legal representatives provided written informed consent.

### 128 **Study setting and selection of participants.**

129 We conducted a cross-sectional study from May 2021 to May 2022 in 14 health districts  
130 in four regions of Cameroon which have been identified as endemic for yaws by the National  
131 Yaws, Leishmaniasis, Leprosy and Buruli Ulcer Control Programme (CNLP2LUB). The  
132 selected health districts included: Messamena, Abong-Mbang, Iomé, Yokadouma, Mbang,  
133 Doumé, Batouri, Bétaré-oya, Ndélélé in the East region; Sangmelima, Djoum, Lolodorf in the  
134 South region, Bankim in the Adamaoua region and Maroua in the Far North region (Fig 1).  
135 Twelve of the 14 health districts participated in both the prevalence and risk factor survey, and  
136 the remaining two districts, Maroua and Ndélélé, only participated in the prevalence survey as  
137 the study overlapped with the field surveillance activities of the national control programme,  
138 which conducted the investigations at these sites.

139 We carried out an active case searching for cutaneous ulcer cases using both school and  
140 community-based activities. For communities with high school enrolment rate and whose  
141 screening period coincided with the school year, the case searching was based in schools. For  
142 communities with low enrolment rates or where the survey was conducted during the holidays,  
143 the case search was house-to-house.

144 Participants underwent clinical examination and those with cutaneous ulcers were  
145 identified and enrolled in the study as cases. Asymptomatic individuals living in the vicinity of

146 the cases, such as the same household or classroom, were enrolled as controls. In addition, we  
147 also enrolled asymptomatic participants from households without cases of cutaneous ulcers as  
148 a further set of controls.

## 149 **Sample collection**

150 We collected samples from cutaneous ulcer cases by swabbing of the ulcerated lesions  
151 and from asymptomatic participants by swabbing the front face of both legs with polyester  
152 tipped swabs with polystyrene handle (Puritan sterile swabs, Cat #25-806 1PD, Puritan Medical  
153 Products- Guilborg, UK). We placed the samples into 500  $\mu$ L of a custom-made lysis buffer  
154 (10 mM Tris, pH 8.0, 0.1 M EDTA, pH 8.0 and 0.5% SDS) and kept them refrigerated (2- 8°C)  
155 until transport to the Centre Pasteur du Cameroun (CPC) in a cooler, where they were stored at  
156 -20°C.

## 157 **Laboratory assessment**

158 We extracted genomic DNA from 200  $\mu$ L of swab lysate using the QIAmp DNA mini  
159 kit (Qiagen, Germany) according to the manufacturer's recommendations and eluted it in a total  
160 volume of 100  $\mu$ L.

161 We performed on the samples three real time singleplex PCRs on the ABI prism 7500  
162 thermocycler (Thermo Fisher Scientific, Waltham, USA). We first detected the *RNAse P* gene,  
163 which codes for an endoribonuclease present in all living cells, and used previously described  
164 primers and probe [27] to confirm the adequacy of the sample and the absence of amplifications  
165 inhibitors. We targeted the V8 region of the 16S ribosomal RNA gene to detect the presence of  
166 *HD* DNA in the samples. The PCR reaction was performed in a total volume of 25  $\mu$ L  
167 containing 0.9  $\mu$ M of each primer and probe (Hd16SV8- F:  
168 5'>TATACAGAGGGCGGCAAACC<3'; Hd16SV8-R:  
169 5'>CCAATCCGGACTTAGACGTAC<3'; Hd16SV8- P: 5'>Fam-CAAAGG

170 GGAGCGAATCTCAC-BHQ1<3'), ABI TaqMan Fast advanced Master Mix and 2  $\mu$ L of the  
171 DNA template. The cycling conditions were: UNG incubation at 50 °C for 2 minutes, pre-  
172 denaturation at 95 °C followed by 40 cycles of denaturation 95 °C for 15 seconds, annealing  
173 and extension at 60 °C for 30 seconds. We detected the presence of *TP* by amplifying the *polA*  
174 gene (*tp0105*), which is a fragment conserved in all *TP* subspecies, using a protocol described  
175 elsewhere [17].

## 176 **Questionnaire**

177 We administered a questionnaire to each participant (or their legal representative). We  
178 collected data either via a smartphone into ODK collect [28] or via a paper form. The  
179 questionnaire consisted of demographic characteristics, information about the house in which  
180 the participant lived, data on possible exposure to cases of cutaneous ulcers and measures of  
181 access to hygiene and sanitation. Local community health workers acted as a translator where  
182 necessary for participants who did not speak English or French.

## 183 **Data management and analyses.**

184 Each participant was attributed a unique ID code at the moment of inclusion, and that  
185 code was used to label his/her risk factor form and samples. The unique ID codes were used for  
186 management and analysis of all data related to the participants.

187 We calculated the prevalence of *HD* as a cause of cutaneous ulcers in the study  
188 population and how this varied by key explanatory variables. We then performed three analyses.  
189 Firstly, we compared individuals with and without a cutaneous ulcer; secondly, we compared  
190 characteristics of individuals whose cutaneous ulcers were or were not caused by *HD*; finally,  
191 we compared the characteristics of asymptomatic individuals who were or were not identified  
192 as carriers of *HD*. For each comparison we initially fitted a univariate logistics regression model.



193 We then fitted multivariable models adjusting for age, sex and variables which were significant  
194 in the univariate analysis. All analysis were done with SPSS Statistics 20.

## 195 **Results**

### 196 **Description of the population**

197 A total of 24,610 people were clinically screened for cutaneous ulcers at the 14 study  
198 sites. Overall, we enrolled 443 participants including 271 individuals with a cutaneous ulcer  
199 and 172 asymptomatic contacts (controls). The sex ratio of males to females was 2.1 for ulcer  
200 cases and 1.4 for asymptomatic individuals. The age of participants ranged from 2 to 60 years,  
201 with a median age of 9 years (Inter Quartile Range (IQR) 7-11).

202 The overall prevalence of cutaneous ulcers in this population was therefore estimated to  
203 be 1.1%. Of these *HD* was identified in 82 (30.3% - 95% CI 24.8 – 36.1%) giving a population  
204 prevalence of *HD* ulcers of 0.3%. Eight out of 14 study sites had at least one cutaneous ulcer  
205 associated with *HD* (Fig 1). The proportion of ulcers caused by *H. ducreyi* was varied: with  
206 Doumé, Maroua and Bankim having the highest proportions of 73.3 % (33/ 45), 72.7 % (8/ 11)  
207 and 68.2% (30/ 44) respectively. Amongst asymptomatic controls *HD* was detected in 15 out  
208 of 172 participants (8.7% - 95% CI 5 – 14%) (Table 1). All cases of asymptomatic colonisation  
209 were detected in only two sites, Bankim (14/15) and Yokadouma (1/15) (S1 Table).

210

### 211 **Fig 1. Geographic location of sampling sites and sites with *HD* confirmed ulcer cases**

212 Of 271 individuals with a cutaneous ulcer *TP* DNA was detected in 14 (5.2% - 95% CI  
213 2.9 – 8.5%). Cases of yaws were found in only two health districts Mbang (13/14) and Lomié  
214 (1/14) and 92.9% were from Baka communities (13/14). Treponemal DNA was detected only  
215 in one asymptomatic individual (0.6% - 95% CI 0 – 3.2%) from Mbang (Fig 2).

216

217 **Fig 2. Appearance of cutaneous ulcers similar to yaws in children in Cameroon.** Legend:

218 A, B, C, D: *HD* cutaneous ulcers; E: yaws ulcer; F: idiopathic ulcer (negative for both *TP* and  
219 *HD*)

220

221 **Table 1: Proportion of individuals in whom *HD* and *TP* were detected.**

| <b>Germ detected</b> | <b>Individuals with a cutaneous ulcer<br/>N = 271</b> | <b>Asymptomatic individuals<br/>N = 172</b> |
|----------------------|-------------------------------------------------------|---------------------------------------------|
| <i>HD</i>            | <b>82 (30.3 %)</b>                                    | <b>15 (8.7 %)</b>                           |
| <i>TP</i>            | <b>14 (5.2 %)</b>                                     | <b>1 (0.6 %)</b>                            |

222

223 Of the 443 participants enrolled in the prevalence study 245 (55.3%) being 127  
224 individuals with ulcers and 118 asymptomatic individuals, completed the risk factor  
225 questionnaire and were included in the risk factor analysis.

226 Both univariate and multivariable analysis revealed that children aged 0-4 years  
227 (adjusted Odd Ratio (aOR): 2.91 - 95% CI 1.02– 8.34,  $p = 0.046$ ) and those aged 15 years and  
228 over (aOR: 5.94 - 95% CI 1.15– 30.70,  $p = 0.034$ ) were more likely to have a cutaneous ulcer  
229 (Table 2). Females were about half less likely to have a cutaneous ulcer (aOR: 0.51 – 95% CI  
230 0.28– 0.93,  $p = 0.028$ ). Members of the Bantou ethnic group had increased odds of yaws like ulcer  
231 compared to Baka (aOR = 0.28 - 95% CI 0.14– 0.59,  $p = 0.001$ ). Some hygiene factors were  
232 associated with a reduced risk of cutaneous ulcers including not sharing their clothes with others  
233 (aOR: 0.45 – 95% CI 0.25– 0.81,  $p = 0.008$ ), and living a large distance from a bin (aOR: 0.37  
234 – 95% CI 0.20– 550.69,  $p = 0.002$ ) but many other household and hygiene related variables did  
235 not appear to be associated (Table 2).

236 **Table 2: Risk factors associated to yaws like cutaneous ulcers**

| Characteristics                      | Total | Presence of ulcer |             | P-value      | Bivariate analysis      |              | Multivariate analysis    |              |
|--------------------------------------|-------|-------------------|-------------|--------------|-------------------------|--------------|--------------------------|--------------|
|                                      |       | No (%)            | Yes (%)     |              | Crude OR (95% CI)       | P-value      | Adjusted OR (95% CI)     | P-value      |
| <b>Range of age</b>                  |       |                   |             | 0.353        |                         |              |                          |              |
| 0-4 years                            | 24    | 11 (45.8%)        | 13 (54.2%)  |              | 1.39 (0.57-3.36)        | 0.469        | <b>2.91 (1.02-8.34)</b>  | <b>0.046</b> |
| 5-9 years                            | 113   | 61 (54.0%)        | 52 (46.0%)  |              | Ref.                    |              | Ref.                     |              |
| 10-14 years                          | 99    | 43 (43.4%)        | 56 (56.6%)  |              | 1.53 (0.89-2.63)        | 0.126        | 1.26 (0.68-2.33)         | 0.458        |
| 15 years and over                    | 9     | 3 (33.3%)         | 6 (66.7%)   |              | 2.35 (0.59-1.23)        | 0.244        | <b>5.94 (1.15-30.70)</b> | <b>0.034</b> |
| <b>Sex</b>                           |       |                   |             | <b>0.007</b> |                         |              |                          |              |
| Female                               | 85    | 51 (60.0%)        | 34 (40.0%)  |              | <b>0.48 (0.28-0.82)</b> | <b>0.007</b> | <b>0.51 (0.28-0.93)</b>  | <b>0.028</b> |
| Male                                 | 160   | 67 (41.9%)        | 93 (58.1%)  |              | Ref.                    |              | Ref.                     |              |
| <b>Ethnicity</b>                     |       |                   |             | <b>0.040</b> |                         |              |                          |              |
| Bantou                               | 173   | 76 (43.9%)        | 97 (56.1%)  |              | Ref.                    |              | Ref.                     |              |
| Baka                                 | 72    | 42 (58.3%)        | 30 (41.7%)  |              | <b>0.56 (0.32-0.98)</b> | <b>0.041</b> | <b>0.28 (0.14-0.59)</b>  | <b>0.001</b> |
| <b>Type of house</b>                 |       |                   |             | 0.502        |                         |              |                          |              |
| Modern house                         | 24    | 10 (41.7%)        | 14 (58.3%)  |              |                         |              |                          |              |
| Traditional house                    | 221   | 108 (48.9%)       | 113 (51.1%) |              |                         |              |                          |              |
| <b>Type of latrines</b>              |       |                   |             | 0.404        |                         |              |                          |              |
| Open air                             | 44    | 25 (56.8%)        | 19 (43.2%)  |              |                         |              |                          |              |
| Traditional latrines                 | 198   | 92 (46.5%)        | 106 (53.5%) |              |                         |              |                          |              |
| WC                                   | 3     | 1 (33.3%)         | 2 (66.7%)   |              |                         |              |                          |              |
| <b>Sharing bed with other people</b> |       |                   |             | 0.212        |                         |              |                          |              |
| No                                   | 34    | 13 (38.2%)        | 21 (61.8%)  |              |                         |              |                          |              |
| Yes                                  | 211   | 105 (49.8%)       | 106 (50.2%) |              |                         |              |                          |              |
| <b>Sharing clothes with others</b>   |       |                   |             | <b>0.040</b> |                         |              |                          |              |

|                                     |     |            |             |                         |              |                         |              |
|-------------------------------------|-----|------------|-------------|-------------------------|--------------|-------------------------|--------------|
| No                                  | 108 | 60 (55.6%) | 48 (44.4%)  | <b>0.59 (0.35-0.98)</b> | <b>0.040</b> | <b>0.45 (0.25-0.81)</b> | <b>0.008</b> |
| Yes                                 | 137 | 58 (42.3%) | 79 (57.7%)  | Ref.                    |              | Ref.                    |              |
| <b>Proximity to an ulcer case</b>   |     |            |             | 0.411                   |              |                         |              |
| No                                  | 85  | 44 (51.8%) | 41 (48.2%)  |                         |              |                         |              |
| Yes                                 | 160 | 74 (46.2%) | 86 (53.8%)  |                         |              |                         |              |
| <b>Proximity with a bin</b>         |     |            |             | <b>0.001</b>            |              |                         |              |
| Far                                 | 78  | 50 (64.1%) | 28 (35.9%)  | <b>0.38 (0.22-0.67)</b> | <b>0.001</b> | <b>0.37 (0.20-0.69)</b> | <b>0.002</b> |
| Close                               | 167 | 68 (40.7%) | 99 (59.3%)  | Ref.                    |              | Ref.                    |              |
| <b>Daily bathing</b>                |     |            |             | 0.440                   |              |                         |              |
| No                                  | 186 | 87 (46.8%) | 99 (53.2%)  |                         |              |                         |              |
| Yes                                 | 59  | 31 (52.5%) | 28 (47.5%)  |                         |              |                         |              |
| <b>Use of soap for bath</b>         |     |            |             | 0.338                   |              |                         |              |
| Occasionally                        | 159 | 73 (45.9%) | 86 (54.1%)  |                         |              |                         |              |
| Always                              | 86  | 45 (52.3%) | 41 (47.7%)  |                         |              |                         |              |
| <b>Constant wearing of shoes</b>    |     |            |             | 0.054                   |              |                         |              |
| No                                  | 136 | 58 (42.6%) | 78 (57.4%)  |                         |              |                         |              |
| Yes                                 | 109 | 60 (55.0%) | 49 (45.0%)  |                         |              |                         |              |
| <b>Frequency of clothing change</b> |     |            |             | <b>0.003</b>            |              |                         |              |
| after a maximum of 2 days           | 62  | 40 (64.5%) | 22 (35.5%)  | <b>0.41 (0.22-0.74)</b> | <b>0.003</b> | <b>0.43 (0.17-0.67)</b> | <b>0.002</b> |
| after at least 3 days               | 183 | 78 (42.6%) | 105 (57.4%) | Ref.                    |              | Ref.                    |              |

237 Legend: Ref= Reference modality.

238           Among individuals with cutaneous ulcers, we found that members of the Bantu ethnic  
239 group were more likely to have *HD* as the causative agent than Baka (51.5% vs 0%,  $p= 0.001$ )  
240 as well as people who relieved themselves in traditional latrines (98% (50/51) of confirmed  
241 cases used traditional toilets) (Table 3). In addition, there was some evidence that close contact  
242 with a cutaneous ulcer case was associated with both *HD* cutaneous ulcer (aOR: 0.27- 95% CI  
243 0.11-0.68,  $p= 0.005$ ) and asymptomatic carriage (close: 20.3% vs not close: 0%,  $p= 0.005$ ). We  
244 also found that the 15 asymptomatic *HD* positive cases were all Bantu (Table 4).

245

246

247

248

249

250

251

252

253

254

255

256

257

**Table 3. Risk factors associated to *HD* cutaneous ulcers**

| Characteristics                      | Total | <i>HD</i> ulcer |              | P-value | Bivariate analysis |         | Multivariate analysis |         |
|--------------------------------------|-------|-----------------|--------------|---------|--------------------|---------|-----------------------|---------|
|                                      |       | Negative (%)    | Positive (%) |         | Crude OR (95% CI)  | P-value | Adjusted OR (95% CI)  | P-value |
| <b>Range of age</b>                  |       |                 |              | 0.228   |                    |         |                       |         |
| 0-4 years                            | 13    | 10 (76.9%)      | 3 (23.1%)    |         | 0.46 (0.11-1.87)   | 0.281   | 3.97 (0.34-45.27)     | 0.266   |
| 5-9 years                            | 52    | 27 (51.9%)      | 25 (48.1%)   |         | 1.43 (0.67-3.07)   | 0.358   | 2.04 (0.83-5.01)      | 0.118   |
| 10-14 years                          | 56    | 34 (60.7%)      | 22 (39.3%)   |         | Ref.               |         | Ref.                  |         |
| 15 years and over                    | 6     | 5 (83.3%)       | 1 (16.7%)    |         | 0.31 (0.03-2.83)   | 0.298   | 0.47 (0.04-5.44)      | 0.548   |
| <b>Sex</b>                           |       |                 |              | 0.789   |                    |         |                       |         |
| Female                               | 34    | 21 (61.8%)      | 13 (38.2%)   |         | 0.90 (0.40-2.01)   | 0.789   | 1.25 (0.46-3.42)      | 0.662   |
| Male                                 | 93    | 55 (59.1%)      | 38 (40.9%)   |         | Ref.               |         | Ref.                  |         |
| <b>Ethnicity</b>                     |       |                 |              | > 0.001 |                    |         |                       |         |
| Bantou                               | 99    | 48 (48.5%)      | 51 (51.5%)   |         | Ref.               |         | Ref.                  |         |
| Baka                                 | 28    | 28 (100.0%)     | 0 (0.0%)     |         | 1                  | -       | 1                     |         |
| <b>Type of house</b>                 |       |                 |              | 0.426   |                    |         |                       |         |
| Modern house                         | 14    | 7 (50.0%)       | 7 (50.0%)    |         |                    |         |                       |         |
| Traditional house                    | 113   | 68 (61.1%)      | 44 (38.9%)   |         |                    |         |                       |         |
| <b>Type of latrines</b>              |       |                 |              | 0.001   |                    |         |                       |         |
| Open air                             | 19    | 19 (100.0%)     | 0 (0.0%)     |         | 1                  | -       | 1                     | -       |
| Traditional latrines                 | 106   | 56 (52.8%)      | 50 (47.2%)   |         | Ref.               |         | Ref.                  |         |
| WC                                   | 2     | 1 (50.0%)       | 1 (50.0%)    |         | 1.12 (0.61-1.31)   | 0.560   | 1.31 (0.05-32.83)     | 0.870   |
| <b>Sharing bed with other people</b> |       |                 |              | 0.833   |                    |         |                       |         |
| No                                   | 21    | 13 (61.9%)      | 8 (38.1%)    |         |                    |         |                       |         |
| Yes                                  | 106   | 63 (59.4%)      | 43 (40.6%)   |         |                    |         |                       |         |
| <b>Sharing clothes with others</b>   |       |                 |              | 0.787   |                    |         |                       |         |

|                                     |     |            |            |              |                         |              |                         |
|-------------------------------------|-----|------------|------------|--------------|-------------------------|--------------|-------------------------|
| No                                  | 48  | 28 (58.3%) | 20 (41.7%) |              |                         |              |                         |
| Yes                                 | 79  | 48 (60.8%) | 31 (39.2%) |              |                         |              |                         |
| <b>Proximity to an ulcer case</b>   |     |            |            | <b>0.034</b> |                         |              |                         |
| No                                  | 41  | 30 (73.2%) | 11 (26.8%) |              | <b>0.42 (0.19-0.95)</b> | <b>0.037</b> | <b>0.27 (0.11-0.68)</b> |
| Yes                                 | 86  | 46 (53.5%) | 40 (46.5%) |              | Ref                     |              | Ref                     |
| <b>Proximity with the bin</b>       |     |            |            | 0.327        |                         |              |                         |
| Far                                 | 28  | 19 (67.9%) | 9 (32.1%)  |              |                         |              |                         |
| Near                                | 99  | 57 (57.6%) | 42 (42.4%) |              |                         |              |                         |
| <b>Daily bathing</b>                |     |            |            | 0.741        |                         |              |                         |
| No                                  | 99  | 60 (60.6%) | 39 (39.4%) |              |                         |              |                         |
| Yes                                 | 28  | 16 (57.1%) | 12 (42.9%) |              |                         |              |                         |
| <b>Use of soap for bath</b>         |     |            |            | 0.857        |                         |              |                         |
| Occasionally                        | 86  | 51 (59.3%) | 35 (40.7%) |              |                         |              |                         |
| Rarely                              | 41  | 25 (61.0%) | 16 (39.0%) |              |                         |              |                         |
| <b>Constant wearing of shoes</b>    |     |            |            | 0.319        |                         |              |                         |
| No                                  | 78  | 44 (56.4%) | 34 (43.6%) |              |                         |              |                         |
| Yes                                 | 49  | 32 (65.3%) | 17 (34.7%) |              |                         |              |                         |
| <b>Frequency of clothing change</b> |     |            |            | 0.380        |                         |              |                         |
| After no more than 2 days           | 22  | 15 (68.2%) | 7 (31.8%)  |              |                         |              |                         |
| After at least 3 days               | 105 | 61 (58.1%) | 44 (41.9%) |              |                         |              |                         |

259 Legend: Ref= Reference modality.

260 **Table 4. Risk factors associated to the carriage of *HD***

| Characteristics                      | Total | Detection of <i>HD</i> |            | P-value      | Bivariate analysis |         | Multivariate analysis |         |
|--------------------------------------|-------|------------------------|------------|--------------|--------------------|---------|-----------------------|---------|
|                                      |       | No (%)                 | Yes (%)    |              | Crude OR (95% CI)  | P-value | Adjusted OR (95% CI)  | P-value |
| <b>Range of age</b>                  |       |                        |            | 0.325        |                    |         |                       |         |
| 0-4 years                            | 11    | 11 (100.0%)            | 0 (0.0%)   |              | 1                  | -       | 1                     | -       |
| 5-9 years                            | 61    | 54 (88.5%)             | 7 (11.5%)  |              | Ref.               |         | Ref.                  |         |
| 10-14 years                          | 43    | 35 (81.4%)             | 8 (18.6%)  |              | 1.76 (0.59-5.30)   | 0.312   | 0.93 (0.27-3.18)      | 0.906   |
| 15 years and over                    | 3     | 3 (100.0%)             | 0 (0.0%)   |              | 1                  | -       | 1                     | -       |
| <b>Sex</b>                           |       |                        |            | 0.166        |                    |         |                       |         |
| Female                               | 51    | 47 (92.2%)             | 4 (7.8%)   |              | 0.43 (0.13-1.45)   | 0.175   | 0.63 (0.16-2.44)      | 0.507   |
| Male                                 | 67    | 56 (83.6%)             | 11 (16.4%) |              | Ref.               |         | Ref.                  |         |
| <b>Ethnicity</b>                     |       |                        |            | <b>0.002</b> |                    |         |                       |         |
| Bantou                               | 76    | 61 (80.3%)             | 15 (19.7%) |              | Ref.               |         |                       |         |
| Baka                                 | 42    | 42 (100%)              | 0 (0.0%)   |              | 1                  | -       | 1                     | -       |
| <b>Type of house</b>                 |       |                        |            | 0.086        |                    |         |                       |         |
| Modern house                         | 10    | 7 (70.0%)              | 3 (30.0%)  |              |                    |         |                       |         |
| Traditional house                    | 108   | 96 (88.9%)             | 12 (11.1%) |              |                    |         |                       |         |
| <b>Type of latrines</b>              |       |                        |            | 0.088        |                    |         |                       |         |
| Open air                             | 25    | 25 (100.0%)            | 0 (0.0%)   |              |                    |         |                       |         |
| Traditional latrines                 | 92    | 77 (83.7%)             | 15 (16.3%) |              |                    |         |                       |         |
| WC                                   | 1     | 1 (100%)               | 0 (0.0%)   |              |                    |         |                       |         |
| <b>Sharing bed with other people</b> |       |                        |            | 0.234        |                    |         |                       |         |
| No                                   | 13    | 10 (76.9%)             | 3 (23.1%)  |              |                    |         |                       |         |
| Yes                                  | 105   | 93 (88.6%)             | 12 (11.4%) |              |                    |         |                       |         |
| <b>Sharing clothes with others</b>   |       |                        |            | 0.837        |                    |         |                       |         |



|                                     |    |             |            |              |     |
|-------------------------------------|----|-------------|------------|--------------|-----|
| No                                  | 60 | 52 (86.7%)  | 8 (13.3%)  |              |     |
| Yes                                 | 58 | 51 (87.9%)  | 7 (12.1%)  |              |     |
| <b>Proximity to an ulcer case</b>   |    |             |            | <b>0.001</b> |     |
| No                                  | 44 | 44 (100.0%) | 0 (0.0%)   |              | 1   |
| Yes                                 | 74 | 59 (79.7%)  | 15 (20.3%) |              | Ref |
| <b>Proximity with the bin</b>       |    |             |            | 0.139        |     |
| Far                                 | 50 | 41 (82.0%)  | 9 (18.0%)  |              |     |
| near                                | 68 | 62 (91.2%)  | 6 (8.8%)   |              |     |
| <b>Daily bathing</b>                |    |             |            | 0.970        |     |
| No                                  | 87 | 76 (87.4%)  | 11 (12.6%) |              |     |
| Yes                                 | 31 | 27 (87.1%)  | 4 (12.9%)  |              |     |
| <b>Use of soap for bath</b>         |    |             |            | 0.874        |     |
| Occasionally                        | 73 | 64 (87.7%)  | 9 (12.3%)  |              |     |
| Rarely                              | 45 | 39 (86.7%)  | 6 (13.3%)  |              |     |
| <b>Constant wearing of shoes</b>    |    |             |            | 0.368        |     |
| No                                  | 58 | 49 (84.5%)  | 9 (15.5%)  |              |     |
| Yes                                 | 60 | 54 (90.0%)  | 6 (10.0%)  |              |     |
| <b>Frequency of clothing change</b> |    |             |            | 0.593        |     |
| After no more than 2 days           | 40 | 34 (85.0%)  | 6 (15.0%)  |              |     |
| After at least 3 days               | 78 | 69 (88.5%)  | 9 (11.5%)  |              |     |

261 Legend: Ref= Reference modality.

## 262 Discussion

263 In this comprehensive study we found that approximately 1% of the screened population  
264 in Cameroon had a cutaneous ulcer and that over 30% of these were associated with *HD*  
265 infection, making it the single commonest causative organism identified. Ulcers were more  
266 frequent in children and appeared to be related to several parameters regarding sanitation and  
267 hygiene. We also detected asymptomatic colonisation with *HD* and this occurred exclusively  
268 in people exposed to an individual with *HD* ulcer.

269 Consistent with some previous studies we found the proportion of cutaneous ulcers  
270 associated with *HD* (30.3%) was much higher than those associated with *TPE* (5.2%). Our  
271 previous surveillance-based study in Cameroon showed that *HD* was responsible for almost  
272 half (49.6%) of yaws-like ulcers identified between 2017 and 2019, slightly more than twice  
273 those caused by *TPE* [17]. In this study, some of the samples were collected from participants  
274 who had washed and disinfected their ulcers prior to collection, which could have led to  
275 degradation or low load of *HD* DNA. The previous study also predominantly involved  
276 investigating reported outbreaks of cutaneous ulcers whilst the current study was conducted in  
277 normal conditions in the community which may also have impacted on our findings.

278 We identified a number of sociodemographic characteristics alongside markers of poor  
279 personal hygiene and sanitation behaviours that were associated with an increased risk of  
280 cutaneous ulcers. Apart from a study in 2017 that did not find a significant association between  
281 age and cutaneous ulcers [29], our results are consistent with the findings of a case-control  
282 study in Ghana where raising age was associated with increased odds of infection [25]. The  
283 practice of activities likely to induce trauma or scratches such as farming, animal husbandry  
284 and rough play tends to increase with age [30]; these smaller wounds could later serve as a  
285 gateway to the bacteria responsible for infection [31]. We found the proportion of men affected

286 by cutaneous ulcers was slightly higher than that of women which has been reported elsewhere.  
287 This may be partially attributed to host biological factors [32] and to a higher risk of  
288 microtrauma amongst boys and men. Ethnicity was the only socio-demographic variable  
289 studied associated both for general cutaneous ulcers and for *HD* ulcers, with Bantu people being  
290 more likely to get infected by *HD* cutaneous ulcers compared to Baka people. These unexpected  
291 results contrast with several previously published reports. Most of the cutaneous ulcers which  
292 correspond to bacterial ulcerative conditions affect preferentially poor people living in warm,  
293 moist climates and mainly in forested tropical regions [33,34]. This correspond to the natural  
294 environment of the Baka population of Central Africa which until then constituted the most at  
295 risks community in this region [35–38].

296 We found people in close and constant contact with other cutaneous ulcer cases were  
297 three times more likely to be infected and most of the cases of *HD* ulcers were detected in  
298 schools, among classmates. This school environment is characterised by close proximity and  
299 frequent contact between children which could favour the transmission of *HD*. Nearly all  
300 individuals with an *HD* ulcer made use of traditional latrines characterized by cracked mud  
301 walls, damp earthen floors and lack of roof. These kinds of toilets might facilitate interactions  
302 with flies which had been identified as possible mechanical vector for the transmission of *TPE*  
303 and *HD*. DNA of *HD* has been detected in flies collected from areas immediately outside the  
304 houses of individuals with cutaneous ulcers [21]. We also found people who shared their clothes  
305 with others or only changed clothes infrequently had an increased risk of cutaneous ulcers  
306 which is consistent with previous studies showing a higher risk among people who share  
307 personal items such as towels, clothes and sponges [25,39,40].

308 *HD* was detected in 15 (8.7%) individuals without cutaneous ulcers which is about half  
309 the rate seen in a previous study [21] . In the current study all asymptomatic individuals in  
310 whom *HD* DNA was detected were linked to a confirmed case of *HD* cutaneous ulcer whereas

311 in the previous study *HD* DNA was found in almost the same proportion in asymptomatic  
312 individuals exposed and not exposed to ulcers [21]. *HD* spreads naturally through skin contact  
313 [33,41], and so far no real evidence of an alternative transmission route has been clearly  
314 demonstrated. In this context, it seems plausible that the *HD* DNA detected in asymptomatic  
315 individuals results from direct or indirect contact with confirmed ulcer cases.

316 Our study had some limitations. Firstly, because of the COVID-19 pandemic, we could  
317 not visit the entire population of the community with many schools and households declining  
318 to undertake the preliminary screening step of inclusion and this could have affected the  
319 representativeness of our study population. We relied predominantly on detection of DNA and  
320 not culture, which is technically challenging, and our data are cross-sectional in nature. As a  
321 result, further studies are needed to draw more robust conclusions about the role of  
322 asymptomatic colonization.

323 Our data confirm that *HD* is a leading cause of cutaneous ulcers in yaws endemic health  
324 district in Cameroon and is associated with limited access to water and sanitation. Whilst we  
325 confirmed the evidence of *HD* colonization have further studies on its viability and implications  
326 for transmission should be undertaken to help inform control strategies.

## 327 **Acknowledgements**

328 This study is part of the Lamp4Yaws EDCTP funded project (grant number RIA2018D-  
329 2495 (grant number RIA2018D-2495). We would like to thank the field team of this study. We  
330 thank all the study participants and their legal representatives for their time.

## 331 **References**

- 332 1. Mitjà O, Lukehart SA, Pokowas G, Moses P, Kapa A, Godornes C, et al. Haemophilus  
333 ducreyi as a cause of skin ulcers in children from a yaws-endemic area of Papua New

- 334 Guinea: A prospective cohort study. *Lancet Glob Heal*. 2014;2: 235–241.  
335 doi:10.1016/S2214-109X(14)70019-1
- 336 2. Roberts SA, Taylor SL. *Haemophilus ducreyi*: A newly recognised cause of chronic  
337 skin ulceration. *Lancet Glob Heal*. 2014;2: e187–e188. doi:10.1016/S2214-  
338 109X(14)70197-4
- 339 3. Marks M, Mitjà O, Solomon AW, Asiedu KB, Mabey DC. Yaws. *Br Med Bull*.  
340 2015;113: 91–100. doi:10.1093/bmb/ldu037
- 341 4. Gangaiah D, Webb KM, Humphreys TL, Fortney KR, Toh E, Tai A, et al.  
342 *Haemophilus ducreyi* cutaneous ulcer strains are nearly identical to class I genital ulcer  
343 strains. *PLoS Negl Trop Dis*. 2015;9: 1–20. doi:10.1371/journal.pntd.0003918
- 344 5. Gangaiah D, Spinola SM. *Haemophilus ducreyi* Cutaneous Ulcer Strains Diverged  
345 from Both Class I and Class II Genital Ulcer Strains: Implications for Epidemiological  
346 Studies. *PLoS Negl Trop Dis*. 2016;10: 1–8. doi:10.1371/journal.pntd.0005259
- 347 6. Kositz C, Butcher R, Marks M. Images in clinical tropical medicine: New diagnostics  
348 for yaws. *Am J Trop Med Hyg*. 2017;96: 3–4. doi:10.4269/ajtmh.16-0639
- 349 7. Marks M, Fookes M, Wagner J, Ghinai R, Sokana O, Solomon AW, et al. Direct  
350 Whole-Genome Sequencing of Cutaneous Strains of *Haemophilus ducreyi*. 2018;24.
- 351 8. G-Beiras C, Ubals M, Corbacho-Monné M, Vall-Mayans M, Mitjà O. Yaws,  
352 *Haemophilus ducreyi*, and Other Bacterial Causes of Cutaneous Ulcer Disease in the  
353 South Pacific Islands. *Dermatol Clin*. 2021;39: 15–22. doi:10.1016/j.det.2020.08.002
- 354 9. Fleming DT, Wasserheit JN. From epidemiological synergy to public health policy and  
355 practice: The contribution of other sexually transmitted diseases to sexual transmission  
356 of HIV infection. *Sex Transm Infect*. 1999;75: 3–17. doi:10.1136/sti.75.1.3

- 357 10. González-Beiras C, Kapa A, Vall-Mayans M, Paru R, Gavilán S, Houinei W, et al.  
358 Single-Dose Azithromycin for the Treatment of *Haemophilus ducreyi* Skin Ulcers in  
359 Papua New Guinea. *Clin Infect Dis*. 2017;65: 2085–2090. doi:10.1093/cid/cix723
- 360 11. Marks M, Chi K, Vahi V, Pillay A, Sokana O, Pavluck A, et al. *Haemophilus ducreyi*  
361 Associated with Skin Ulcers among Children , Solomon Islands. 2014;20.
- 362 12. Marckmann P, Hojbjerg T, von Eyben FE, Christensen I. Imported pedal chancroid:  
363 Case report. *Genitourin Med*. 1989;65: 126–127. doi:10.1136/sti.65.2.126
- 364 13. McBride WJH, Hannah RCS, Le Cornec GM, Bletchly C. Cutaneous chancroid in a  
365 visitor from Vanuatu. *Australas J Dermatol*. 2008;49: 98–99. doi:10.1111/j.1440-  
366 0960.2008.00439.x
- 367 14. van Hattem JM, Langeveld TJC, Bruisten SM, Kolader M, Grobusch MP, de Vries  
368 HJC, et al. *Haemophilus ducreyi* cutaneous ulcer contracted at Seram Island, Indonesia,  
369 presented in the Netherlands. *PLoS Negl Trop Dis*. 2018;12: 1–9.  
370 doi:10.1371/journal.pntd.0006273
- 371 15. Humphrey S, Romney M, Au S. *Haemophilus ducreyi* leg ulceration in a 5-year-old  
372 boy. *Journal of the American Academy of Dermatology*. MOSBY-ELSEVIER 360  
373 PARK AVENUE SOUTH, NEW YORK, NY 10010-1710 USA; 2007. pp. AB121–  
374 AB121.
- 375 16. Ghinai R, El-duah P, Chi K, Pillay A, Solomon AW, Bailey RL, et al. A Cross-  
376 Sectional Study of ‘ Yaws ’ in Districts of Ghana Which Have Previously Undertaken  
377 Azithromycin Mass Drug Administration for Trachoma Control. 2015; 1–10.  
378 doi:10.1371/journal.pntd.0003496
- 379 17. Ngono JPN, Tchatchouang S, Tsanga MVN, Tabah EN, Tchualeu A, Asiedu K, et al.

- 380 Ulcerative skin lesions among children in cameroon: It is not always yaws. PLoS Negl  
381 Trop Dis. 2021;15. doi:10.1371/JOURNAL.PNTD.0009180
- 382 18. González-Beiras C, Marks M, Chen CY, Roberts S, Mitjà O. Epidemiology of  
383 Haemophilus ducreyi infections. Emerg Infect Dis. 2016;22: 1–8.  
384 doi:10.3201/eid2201.150425
- 385 19. Fegan D, Glennon MJ, Kool J, Taleo F. Tropical leg ulcers in children: more than  
386 yaws. Trop Doct. 2016;46: 90–93. doi:10.1177/0049475515599326
- 387 20. Chi KH, Danavall D, Taleo F, Pillay A, Ye T, Nachamkin E, et al. Molecular  
388 differentiation of treponema pallidum subspecies in skin ulceration clinically suspected  
389 as yaws in vanuatu using real-time multiplex PCR and serological methods. Am J Trop  
390 Med Hyg. 2015;92: 134–138. doi:10.4269/ajtmh.14-0459
- 391 21. Houinei W, Godornes C, Kapa A, Knauf S, Mooring EQ, González-Beiras C, et al.  
392 Haemophilus ducreyi DNA is detectable on the skin of asymptomatic children, flies  
393 and fomites in villages of Papua New Guinea. PLoS Negl Trop Dis. 2017;11:  
394 e0004958. doi:10.1371/journal.pntd.0004958
- 395 22. Bruisten SM, Cajro I, Fennema H, Pijl A, Buimer M, Peerbooms PGH, et al.  
396 Diagnosing genital ulcer disease in a clinic for sexually transmitted diseases in  
397 Amsterdam, The Netherlands. J Clin Microbiol. 2001;39: 601–605.  
398 doi:10.1128/JCM.39.2.601-605.2001
- 399 23. Tekle-Michael T, Van Dyck E, Abdellati S, Laga M. Development of a heminested  
400 polymerase chain reaction assay for the detection of Haemophilus ducreyi in clinical  
401 specimens. Int J STD AIDS. 2001;12: 797–803. doi:10.1258/0956462011924425
- 402 24. Lewis DA. Epidemiology, clinical features, diagnosis and treatment of Haemophilus

- 403           ducreyi-a disappearing pathogen? *Expert Rev Anti Infect Ther.* 2014;12: 687–696.  
404           doi:10.1586/14787210.2014.892414
- 405   25.   Okine RNA, Sarfo B, Adanu RM, Kwakye-Maclean C, Osei FA. Factors associated  
406           with cutaneous ulcers among children in two yaws-endemic districts in Ghana. *Infect*  
407           *Dis Poverty.* 2020;9: 1–9. doi:10.1186/s40249-020-00641-2
- 408   26.   Attribution-noncommercial-sharealike CC, License I, By-nc-sa CC, Trust A. Of Apes  
409           and Men : Baka and Bantu Attitudes to Wildlife and the Making of Eco-Goodies and  
410           Baddies Author ( s ): Axel Köhler Published by : Ashoka Trust for Research in  
411           Ecology and the Environment and Wolters Stable URL :  
412           <https://www.jstor.org/stable/263965>. 2005;3: 407–435.
- 413   27.   Who T, Centre C, Atlanta CDC, States U. CDC protocol of realtime RTPCR for swine  
414           influenza A(H1N1) 28. *Control.* 2009;1.
- 415   28.   Hartung C, Anokwa Y, Brunette W, Lerer A, Tseng C, Borriello G. Open data kit:  
416           Tools to build information services for developing regions. *ACM Int Conf Proceeding*  
417           *Ser.* 2010. doi:10.1145/2369220.2369236
- 418   29.   Dzotsi E, Agana N, Ohene S-A, Adjabeng M, Aziz A, Odoom JK. Factors Associated  
419           with Yaws Infections in the West Akim Municipality, Ghana. *Int J Trop Dis Heal.*  
420           2017;22: 1–9. doi:10.9734/ijtdh/2017/32425
- 421   30.   Costa e Silva L, Fragoso MI, Teles J. Physical Activity–Related Injury Profile in  
422           Children and Adolescents According to Their Age, Maturation, and Level of Sports  
423           Participation. *Sports Health.* 2017;9: 118–125. doi:10.1177/1941738116686964
- 424   31.   Zachary JF. C H A P T E R 4 Mechanisms of Microbial Infections 1. 2020.
- 425   32.   Janowicz DM, Ofner S, Katz BP, Spinola SM. Experimental infection of human



- 426 volunteers with *Haemophilus ducreyi*: Fifteen years of clinical data and experience. *J*  
427 *Infect Dis.* 2009;199: 1671–1679. doi:10.1086/598966
- 428 33. Mitjà O, Asiedu K, Mabey D. Yaws. *Lancet.* 2013;381: 763–773. doi:10.1016/S0140-  
429 6736(12)62130-8
- 430 34. Marks M, Lebari D, Solomon AW, Higgins SP. Yaws. *Int J STD AIDS.* 2015;26: 696–  
431 703. doi:10.1177/0956462414549036
- 432 35. Pampiglione S, Wilkinson AE. A study of yaws among pygmies in Cameroon and  
433 Zaire. *Brit J vener Dis.* 1975;51: 165. doi:10.1136/sti.51.3.165
- 434 36. Martin PM V, Gonzalez JP, Martin MH, Georges-Courbot MC, Palisson MJ, Georges  
435 AJ. Clinical Aspects and Usefulness of Indirect Absorbed Immunofluorescence for  
436 Diagnosis of Yaws in Central Africa. *J Clin Microbiol.* 1988. Available:  
437 <https://journals.asm.org/journal/jcm>
- 438 37. Manirakiza A, Vilas Boas S, Beyam N, Zadanga G, Konamna FX, Njuimo SP, et al.  
439 Clinical outcome of skin yaws lesions after treatment with benzathinebenzylpenicillin  
440 in a pygmy population in Lobaye, Central African Republic. 2011. doi:10.1186/1756-  
441 0500-4-543
- 442 38. Coldiron M, Obvala D, Mouniaman-Nara I, Pena J, Blondel C, Porten K. The  
443 prevalence of yaws among the Aka in the Congo. *Med Sante Trop.* 2013;23: 231–232.
- 444 39. Tettey A. School of public health, college of health sciences, University of Ghana-  
445 Legon, factors associated with yaws in the Ga West district of Ghana ( A Case-control  
446 study at Obom). University of Ghana. 2009. Available:  
447 <http://197.255.68.203/handle/123456789/8816>
- 448 40. Sitanggang YA, Hutapea H, Suhardi S, Maladan Y, Wahyuni T, Rokmad MF.

- 449 Serologic observation and risk factor of yaws in Hamadi Public Health Center,  
450 Jayapura. Heal Sci J Indones. 2017;8: 25–29. doi:10.22435/hsji.v8i1.6387.25-29
- 451 41. Lewis DA, Mitjà O. Haemophilus ducreyi: From sexually transmitted infection to skin  
452 ulcer pathogen. Curr Opin Infect Dis. 2016;29: 52–57.  
453 doi:10.1097/QCO.0000000000000226

## 454 **Supporting information**

- 455 **S1 file. Distribution of *H. ducreyi* and *T. pallidum* positive participants per site.** Legend:  
456 CU= cutaneous ulcer case; AS= asymptomatic individual

### Legend

- Study sites with no *H. ducreyi* cutaneous ulcer cases
- Study sites with [1-10[ confirmed *H. ducreyi* cutaneous ulcer cases
- Study sites with [10-40] confirmed *H. ducreyi* cutaneous ulcer cases

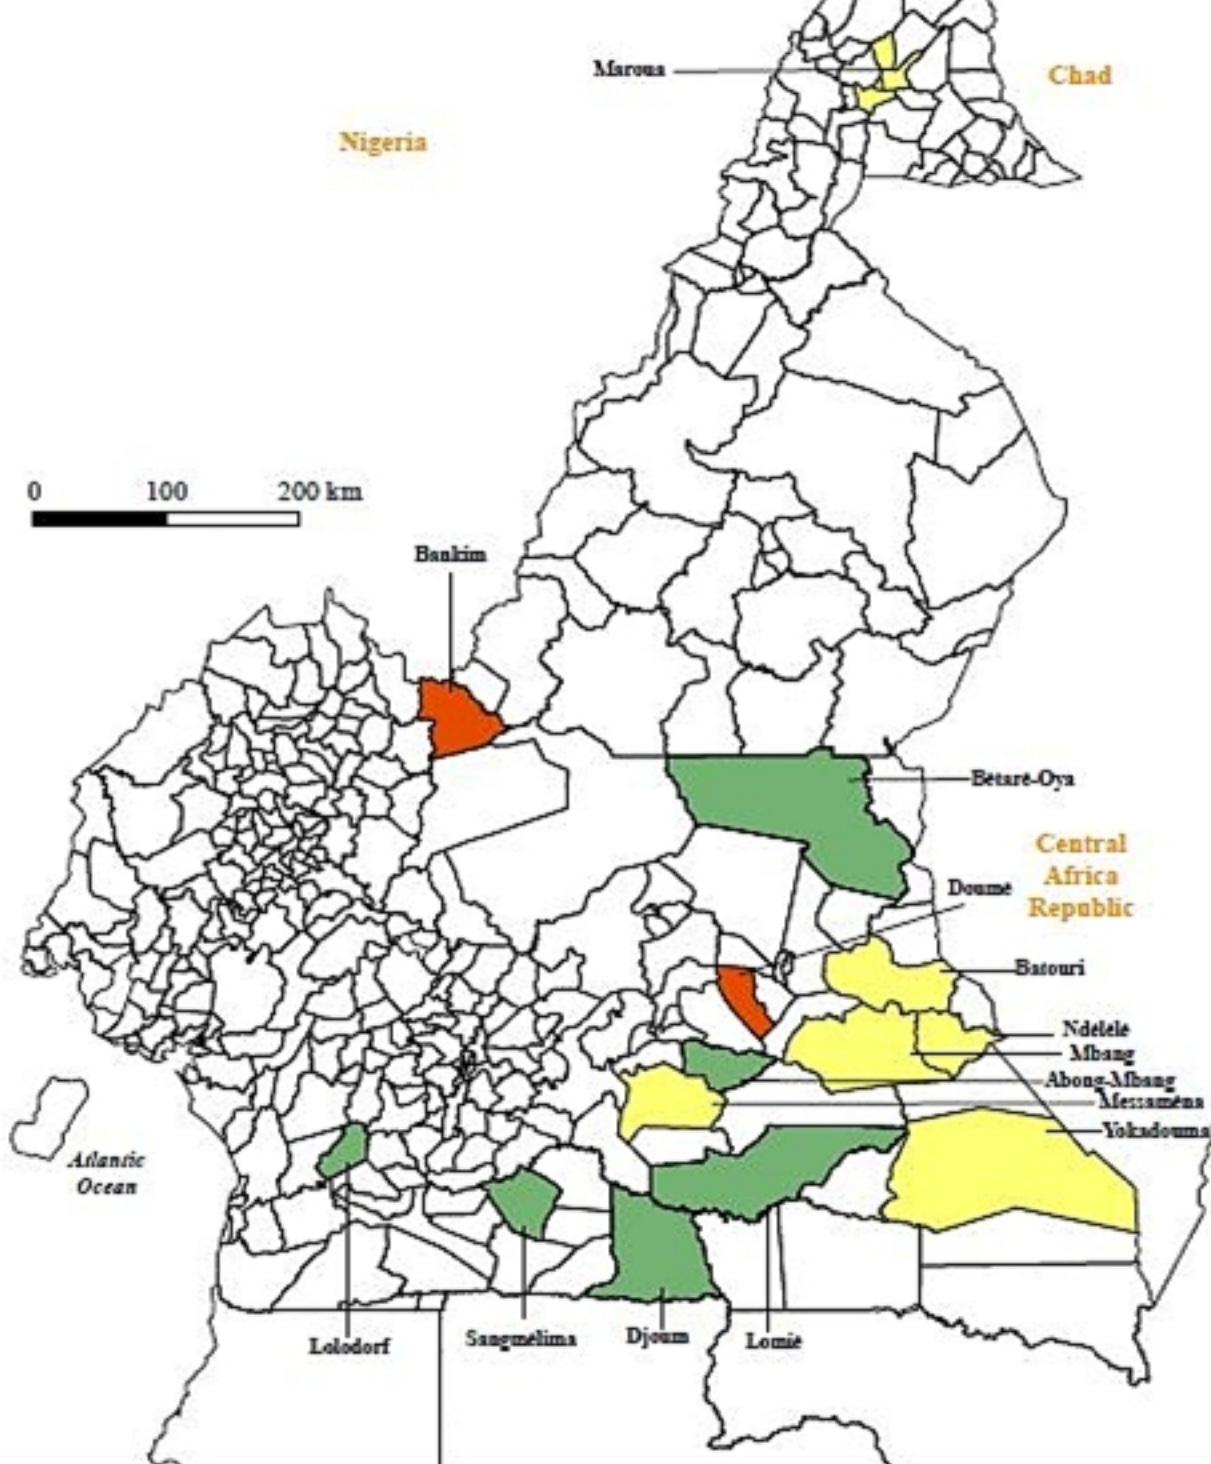

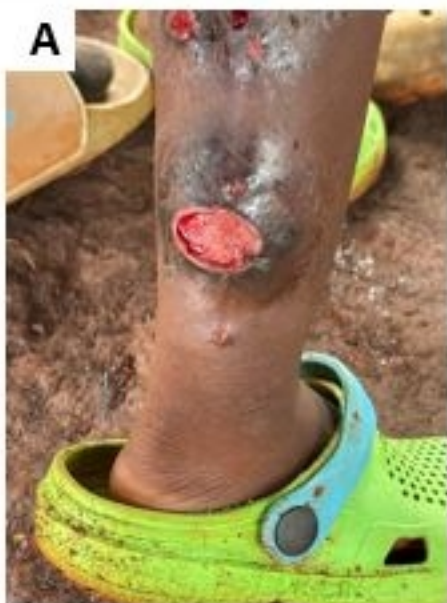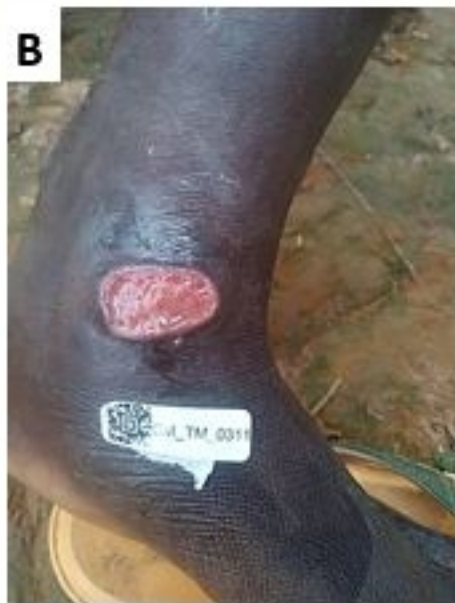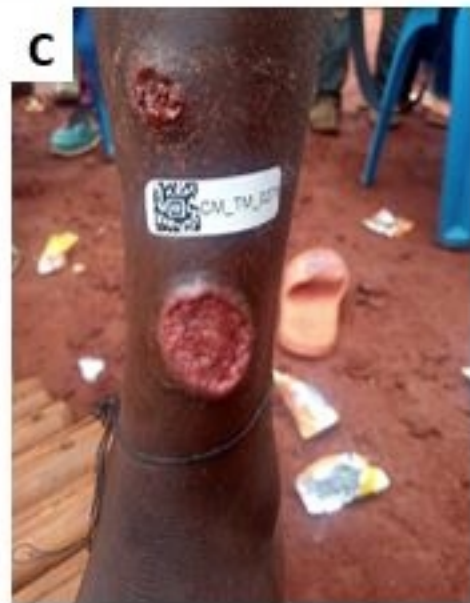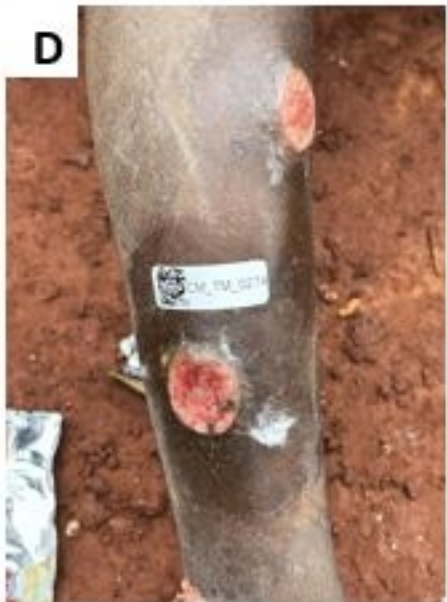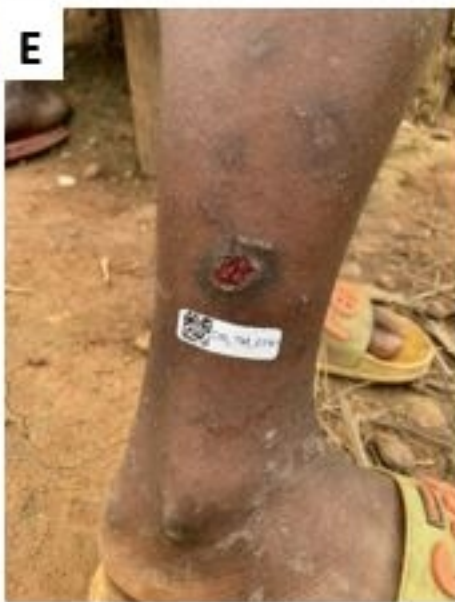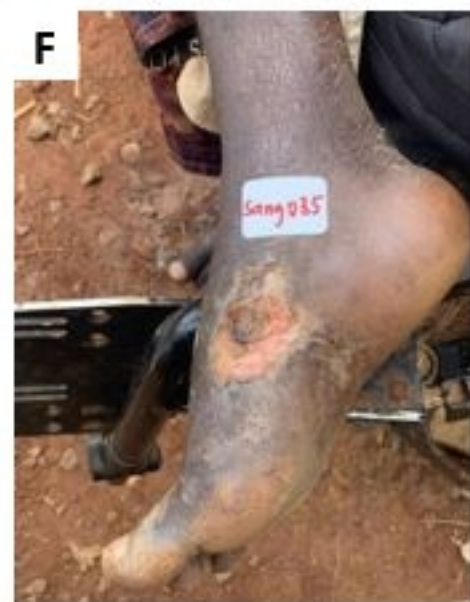

Source: https://medrxiv.org/content/10.1101/2023.07.28.23293301.full.pdf
